# Supplementary material
Source: HighWire-hosted journal article supplement (https://jitc.bmj.com/content/7/1/7)
Supplement: media-2 [file media-2.pdf]

**SK-MEL-37**

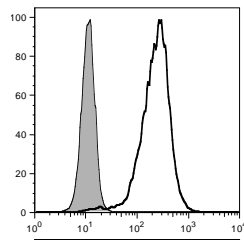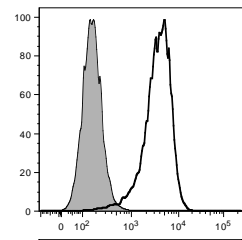

**A375**

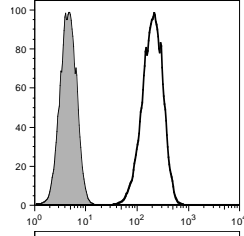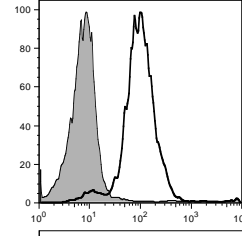

**MZ-MEL-19**

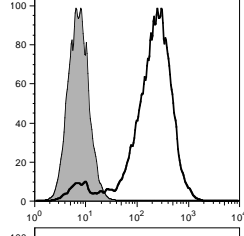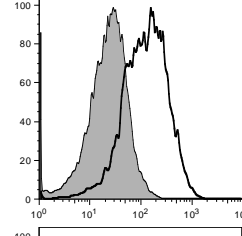

**Mel624.38**

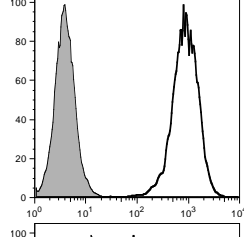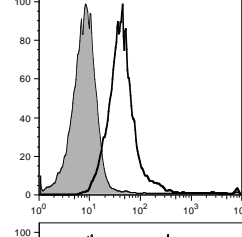

**NW-MEL-38**

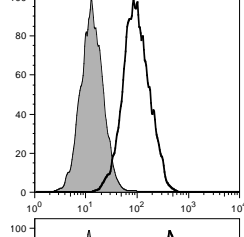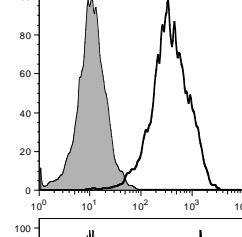

**MZ-MEL-9**

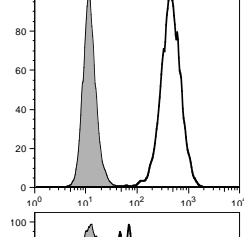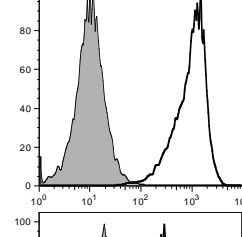

**19305EOC**

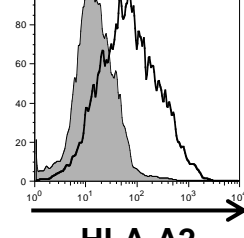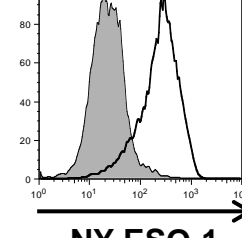

**HLA-A2**

**NY-ESO-1**

**Additional file 2.** Intensity of HLA-A2 and NY-ESO-1 expression on A\*02+NY-ESO-1+ cancer cell lines. Surface HLA-A2 (clone: BB7.2) and cytoplasmic NY-ESO-1 (clone: 219-510) expression was analyzed by flow cytometry. Shaded histogram is unstained control.
