# Supplementary material
Source: HighWire-hosted journal article supplement (https://jitc.bmj.com/content/7/1/7)
Supplement: media-3 [file media-3.pdf]

[TCR  $\alpha$  chain]

ATGGAAACTCTCCTGGGAGTGTCTTTGGTGATTCTATGGCTTCAACTGGCTAGGGTGAA  
CAGTCAACAGGGAGAAGAGGATCCTCAGGCCTTGAGCATCCAGGAGGGTGAAAATGCC  
ACCATGAACTGCAGTTACAAAAGTATAAAACAATTTACAGTGGTATAGACAAAATTCA  
GGTAGAGGCCTTGTCCACCTAATTTTAATACGTTCAAATGAAAGAGAGAAAACACAGTGG  
AAGATTAAGAGTCACGCTTGACACTTCCAAGAAAAGCAGTTCCTTGTGATCACGGCTTC  
CCGGGCAGCAGACACTGCTTCTTACTTCTGTGCTACGGACGGGGGGGGCACCCTCACC  
TTTGGGAAGGGGACTATGCTTCTAGTCTCTCCAGATATCCAGAACCCTGACCCTGCCGT  
GTACCAGCTGAGAGACTCTAAATCCAGTGACAAGTCTGTCTGCCTATTCACCGATTTTGA  
TTCTCAAACAATGTGTCAAAAGTAAGGATTCTGATGTGTATATCACAGACAAAAGTGT  
GCTAGACATGAGGTCTATGGACTTCAAGAGCAACAGTGCTGTGGCCTGGAGCAACAAT  
CTGACTTTGCATGTGCAAACGCCTTCAACAACAGCATTATTCCAGAAGACACCTTCTTCC  
CCAGCCCAGAAAAGTTCTGTGATGTCAAGCTGGTCGAGAAAAGCTTTGAAACAGATACG  
AACCTAAACTTTCAAACCTGTCAGTGATTGGGTTCCGAATCCTCCTCCTGAAAGTGGC  
CGGGTTAATCTGCTCATGACGCTGCGGCTGTGGTCCAGCTGA

[TCR  $\beta$  chain]

ATGGACTCCTGGACCCTCTGCTGTGTGTCCCTTTGCATCCTGGTAGCAAAGCACACAGA  
TGCTGGAGTTATCCAGTCACCCCGGCACGAGGTGACAGAGATGGGACAAGAAGTGACT  
CTGAGATGTAAACCAATTTTCAGGACACGACTACCTTTTCTGGTACAGACAGACCATGAT  
GCGGGGACTGGAGTTGCTCATTTACTTTAACAACAACGTTCCGATAGATGATTCAGGGA  
TGCCCGAGGATCGATTCTCAGCTAAGATGCCTAATGCATCATTCTCCACTCTGAAGATC  
CAGCCCTCAGAACCCAGGGACTCAGCTGTGTAATTCTGTGCCAGCAAGTGGGGCGGCA  
CTGAAGCTTTCTTTGGACAAGGCACCAGACTCACAGTTGTAGAGGACCTGAACAAGGTG  
TTCCACCCGAGGTCGCTGTGTTTGAGCCATCAGAAGCAGAGATCTCCACACCCAAAA  
GGCCACACTGGTGTGCCTGGCCACAGGCTTCTTCCCTGACCACGTGGAGCTGAGCTGG  
TGGGTGAATGGGAAGGAGGTGCACAGTGGGGTCAGCACGGACCCGCAGCCCCTCAAG  
GAGCAGCCCGCCCTCAATGACTCCAGATACTGCCTGAGCAGCCGCCTGAGGGTCTCGG  
CCACCTTCTGGCAGAACCCCGCAACCCTTCCGCTGTCAAGTCCAGTTCTACGGGCT  
CTCGGAGAATGACGAGTGGACCCAGGATAGGGCCAAACCCGTCACCCAGATCGTCAGC  
GCCGAGGCCTGGGGTAGAGCAGACTGTGGCTTTACCTCGGTGTCCTACCAGCAAGGG  
GTCCTGTCTGCCACCATCCTCTATGAGATCCTGCTAGGGAAGGCCACCCTGTATGCTGT  
GCTGGTCAGCGCCCTTGTGTTGATGGCCATGGTCAAGAGAAAGGATTTCTGA

**Additional file 3.** TCR  $\alpha$  and  $\beta$  chain nucleotide sequences of 19305DP.
